# Supplementary figures and images for: Long non-coding RNAs function annotation: a global prediction method based on bi-colored networks
Source: PubMed Central journal article supplement — Nucleic Acids Res. 2012 Nov 5;41(2):e35. doi: 10.1093/nar/gks967 (PMC3554231; doi:10.1093/nar/gks967), 2012-11-05

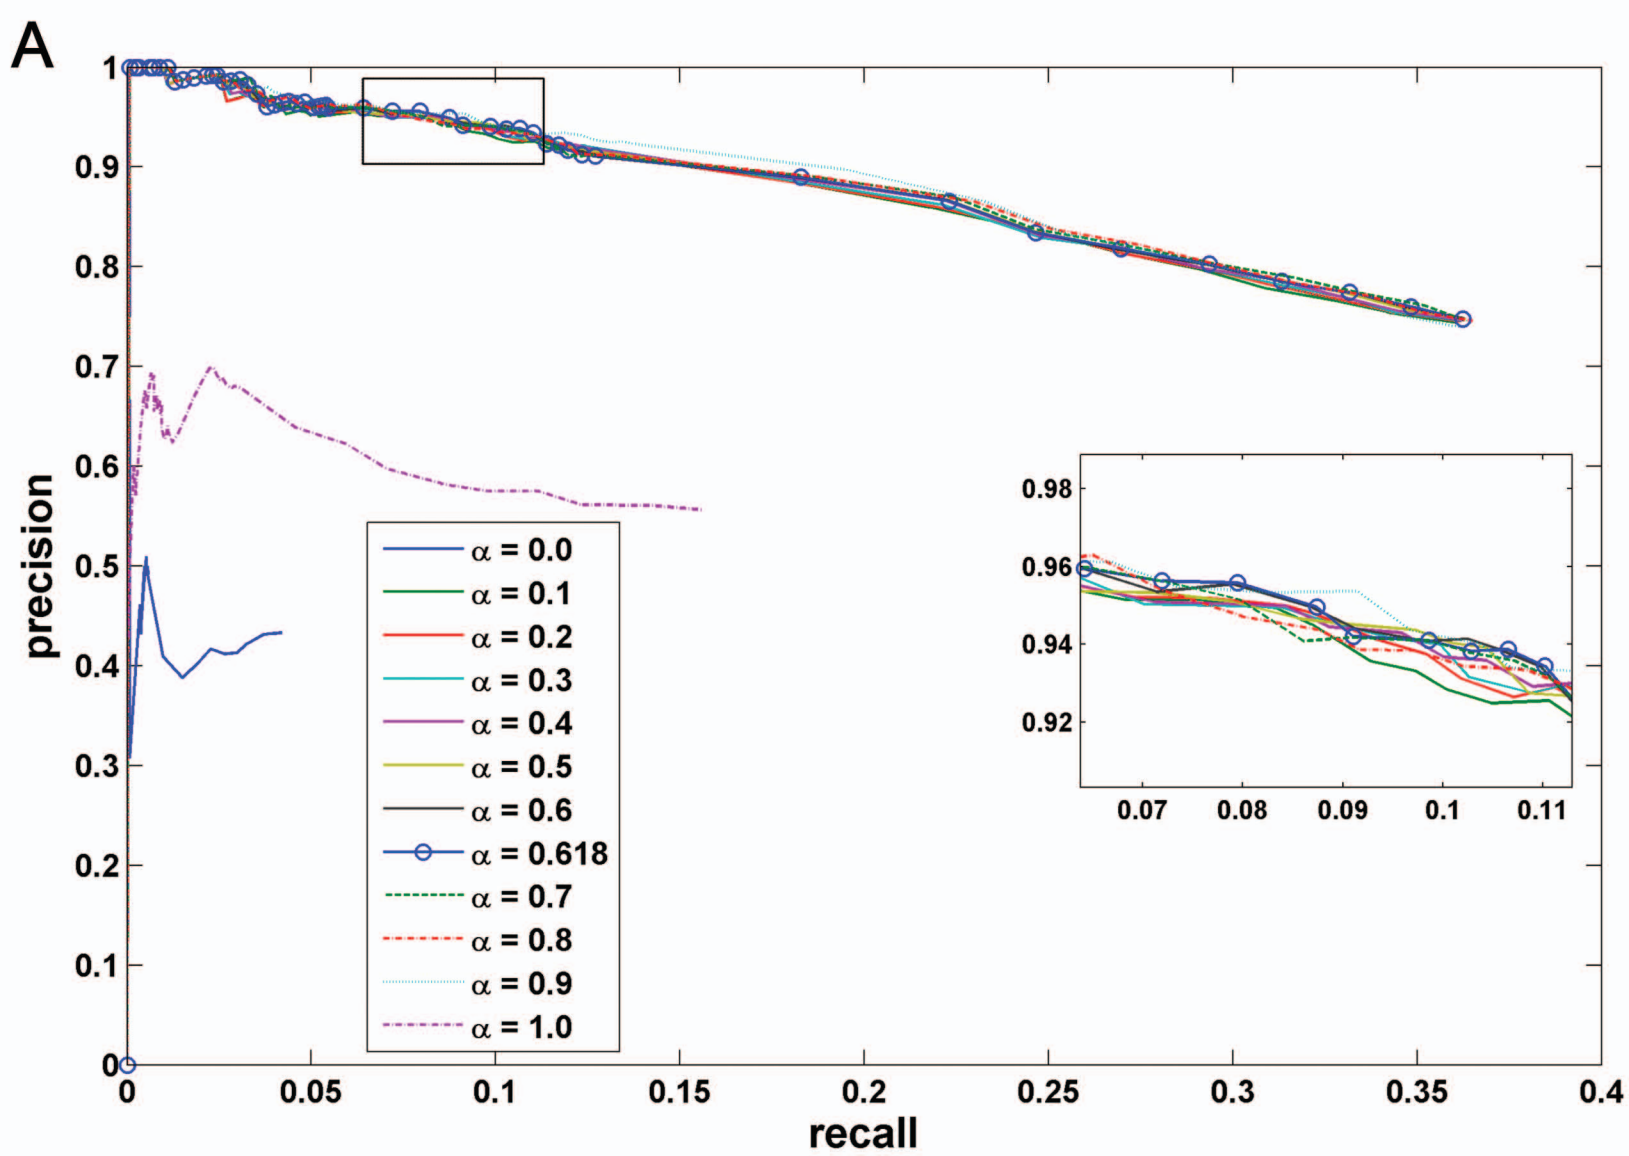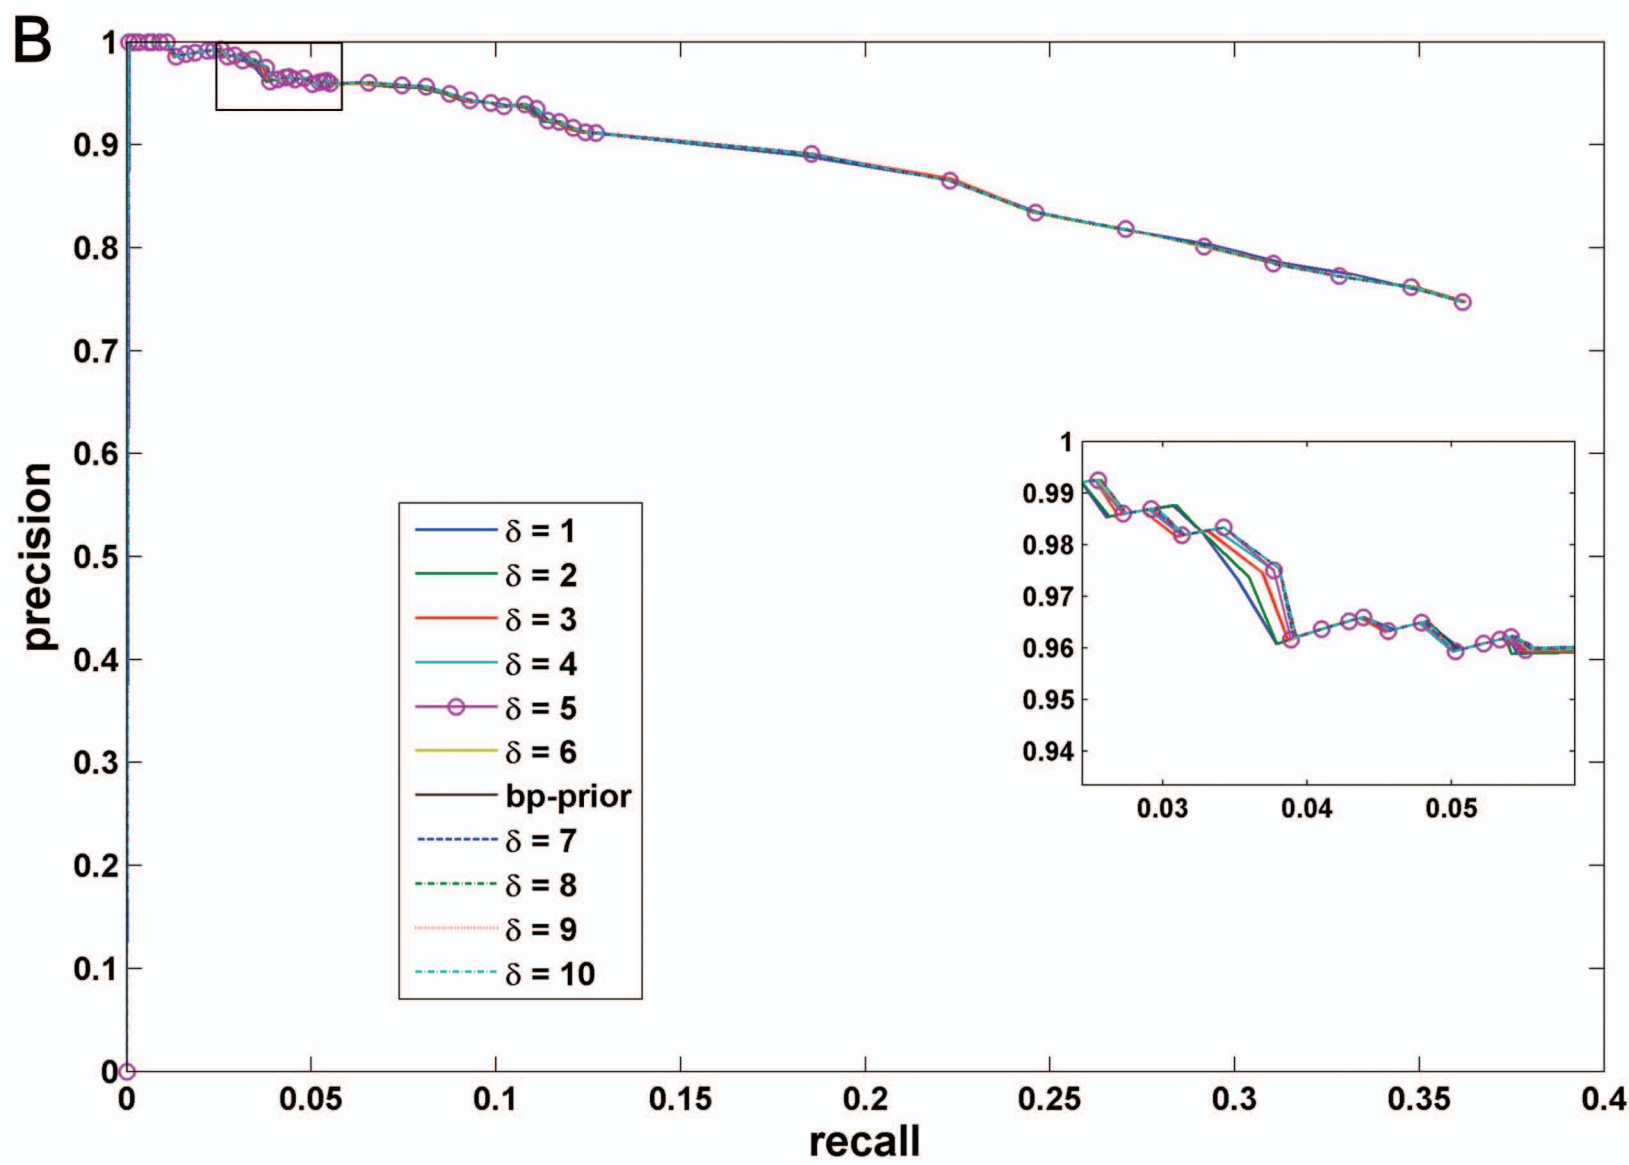

Supplement: supp_gks967_nar-01898-met-n-2012-File007.pdf [file supp_gks967_nar-01898-met-n-2012-File007.pdf]

Supplementary Figure 6

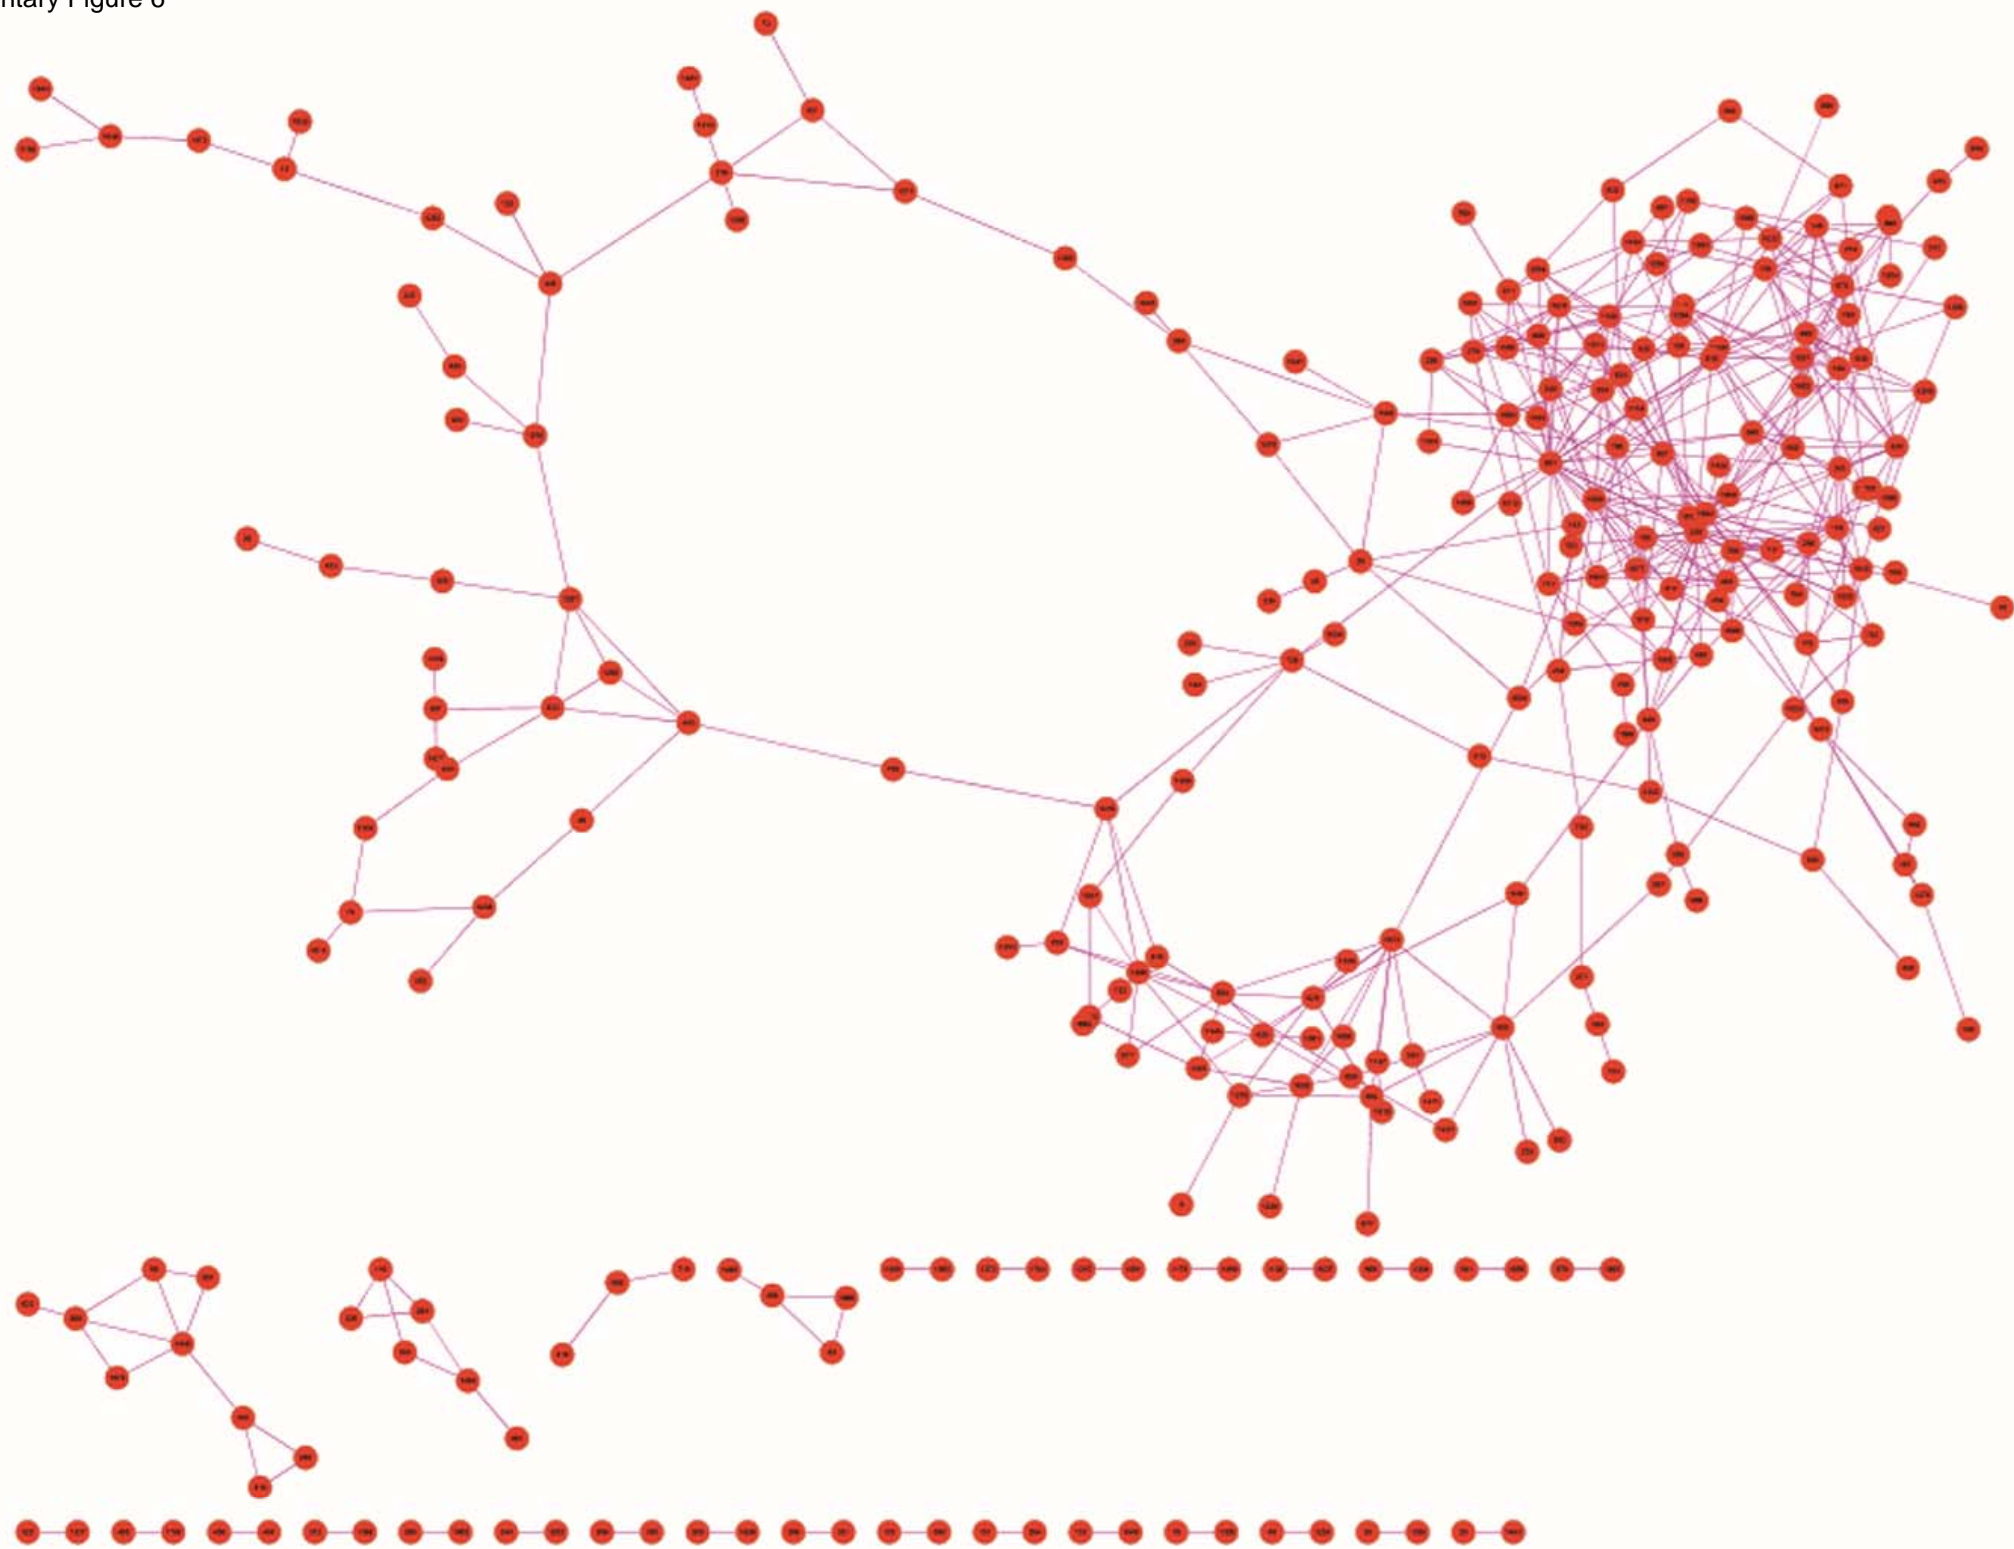

Supplementary Figure 7

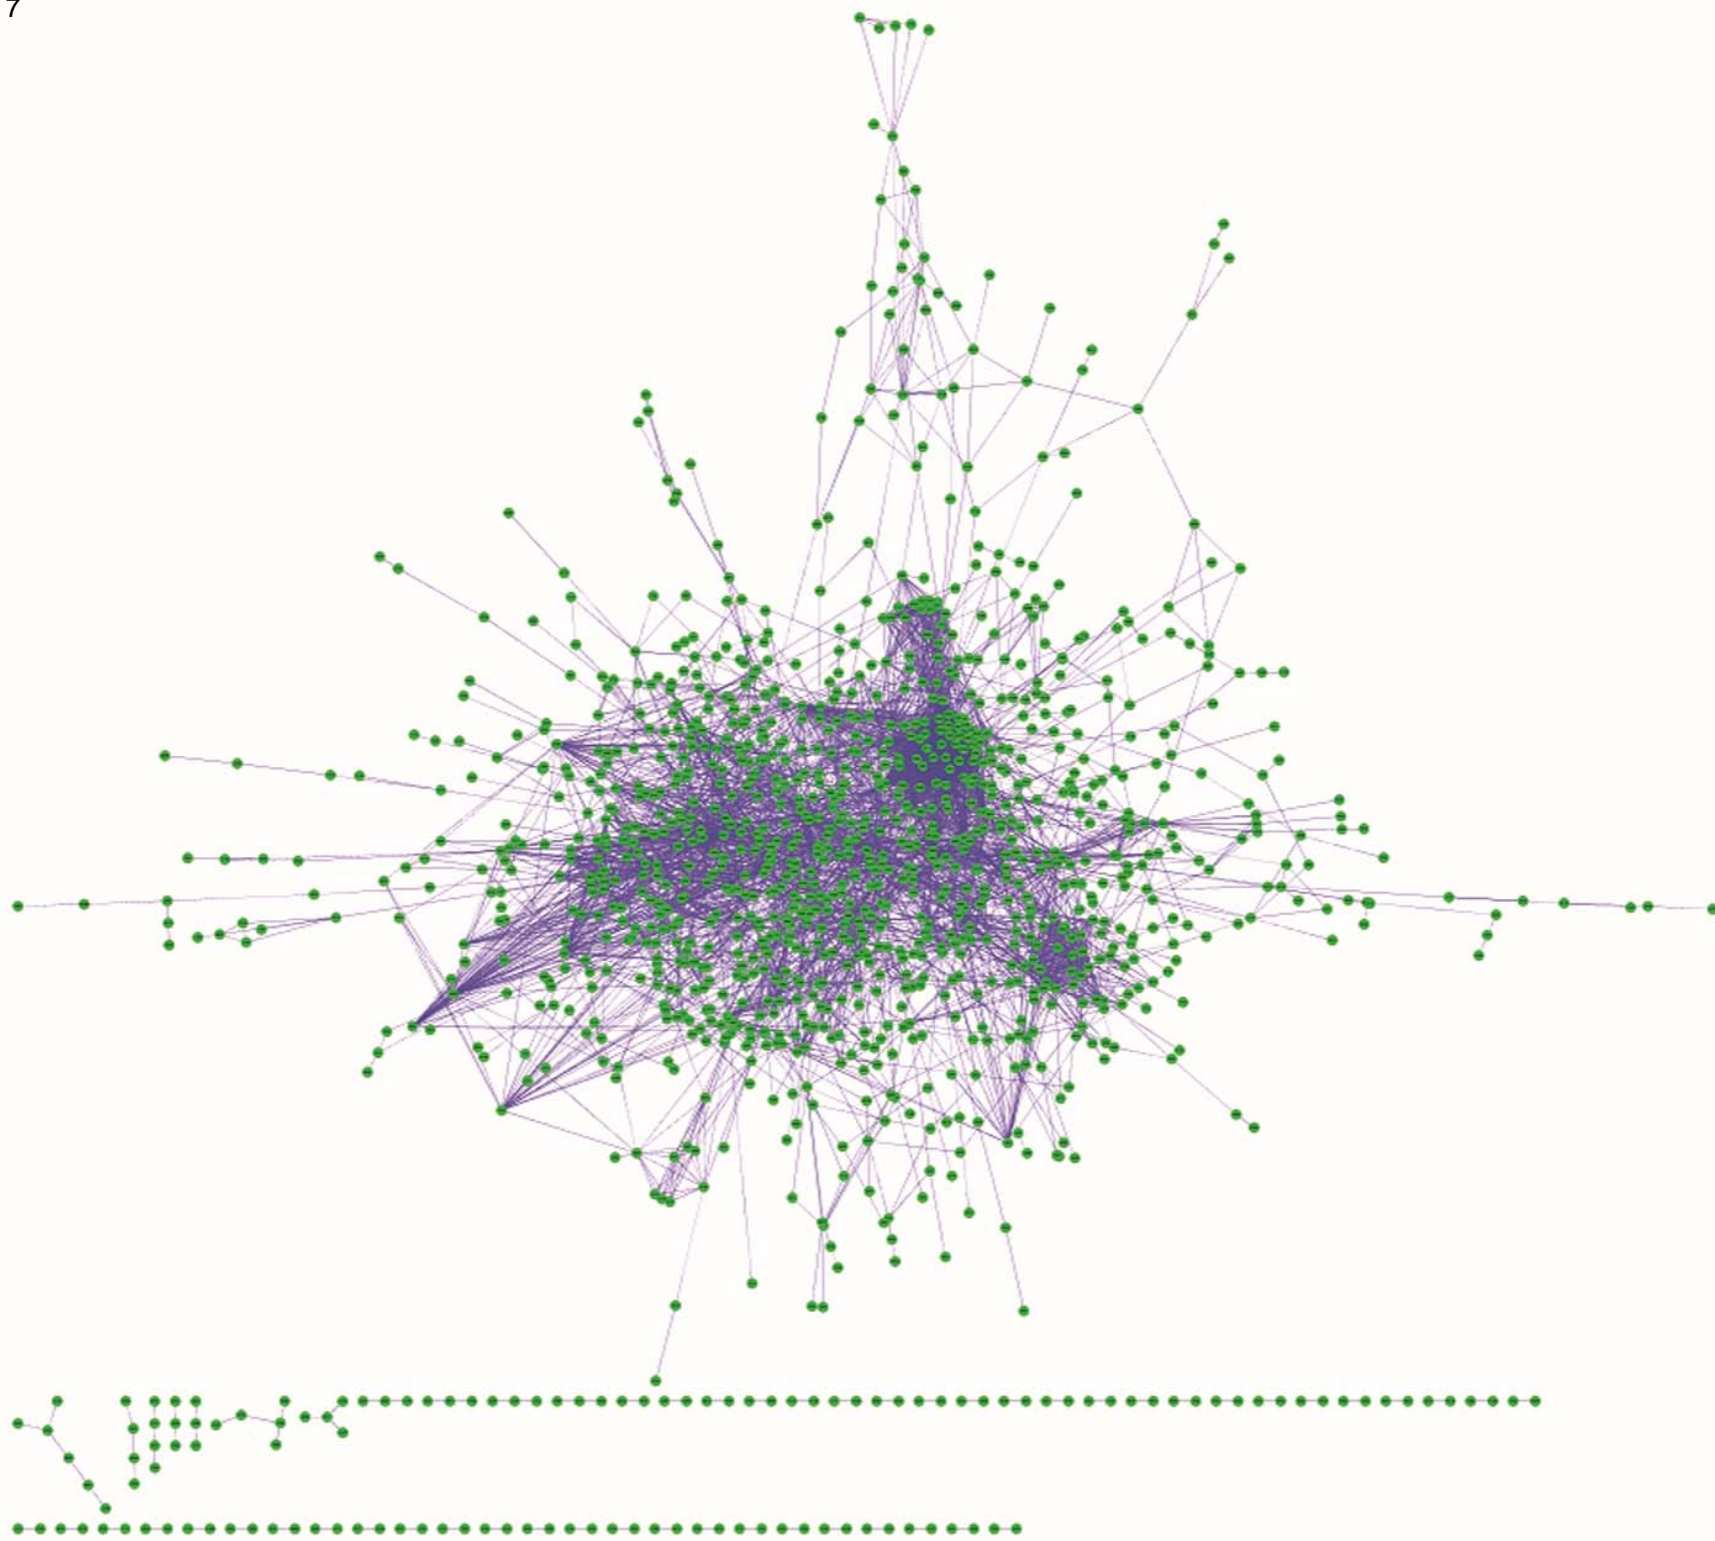

Supplementary Figure 8

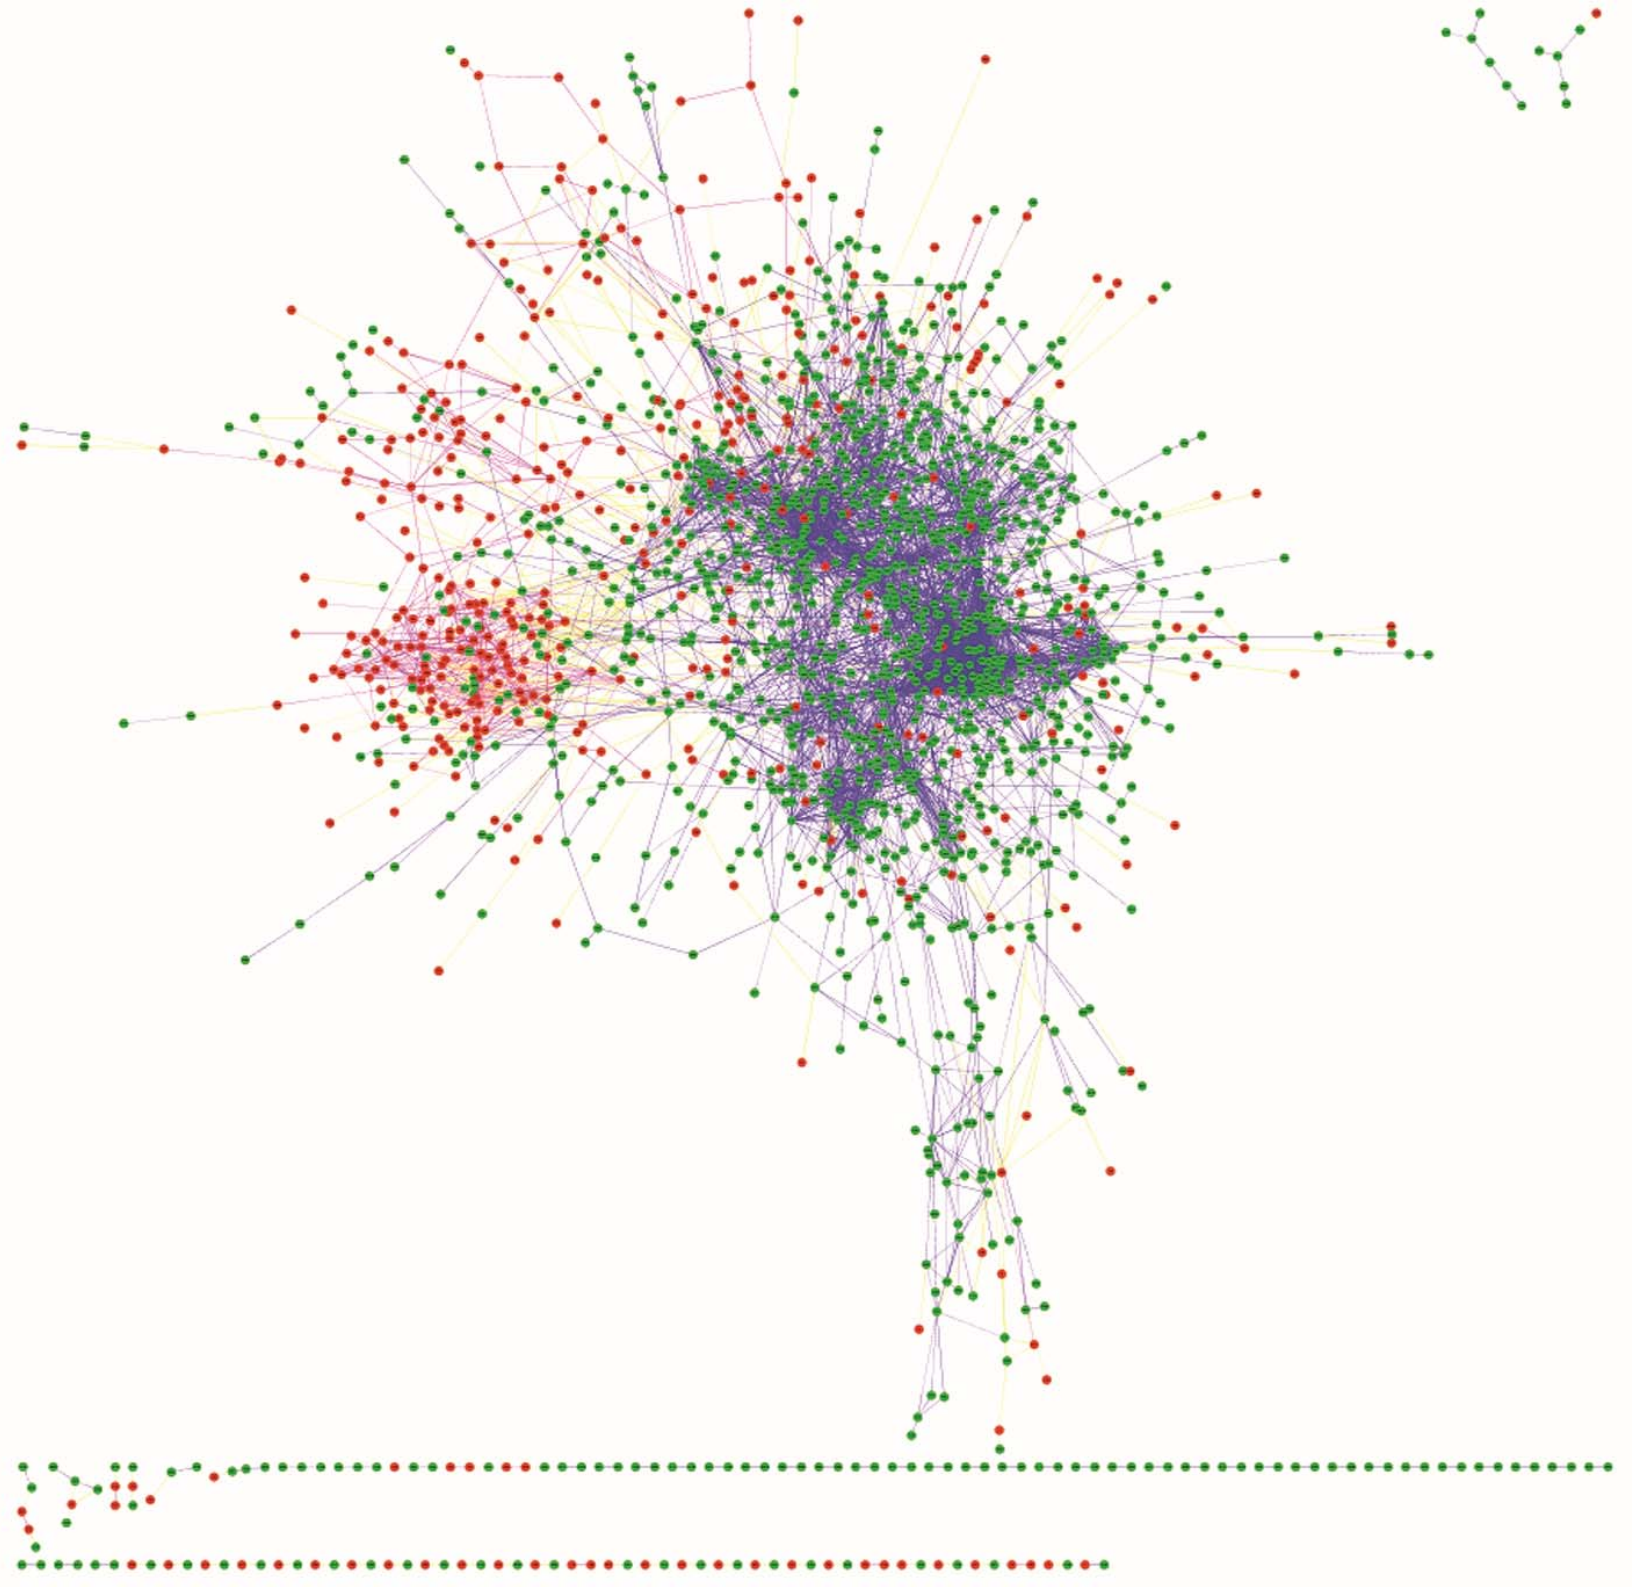

Supplement: supp_gks967_nar-01898-met-n-2012-File009.pdf [file supp_gks967_nar-01898-met-n-2012-File009.pdf]

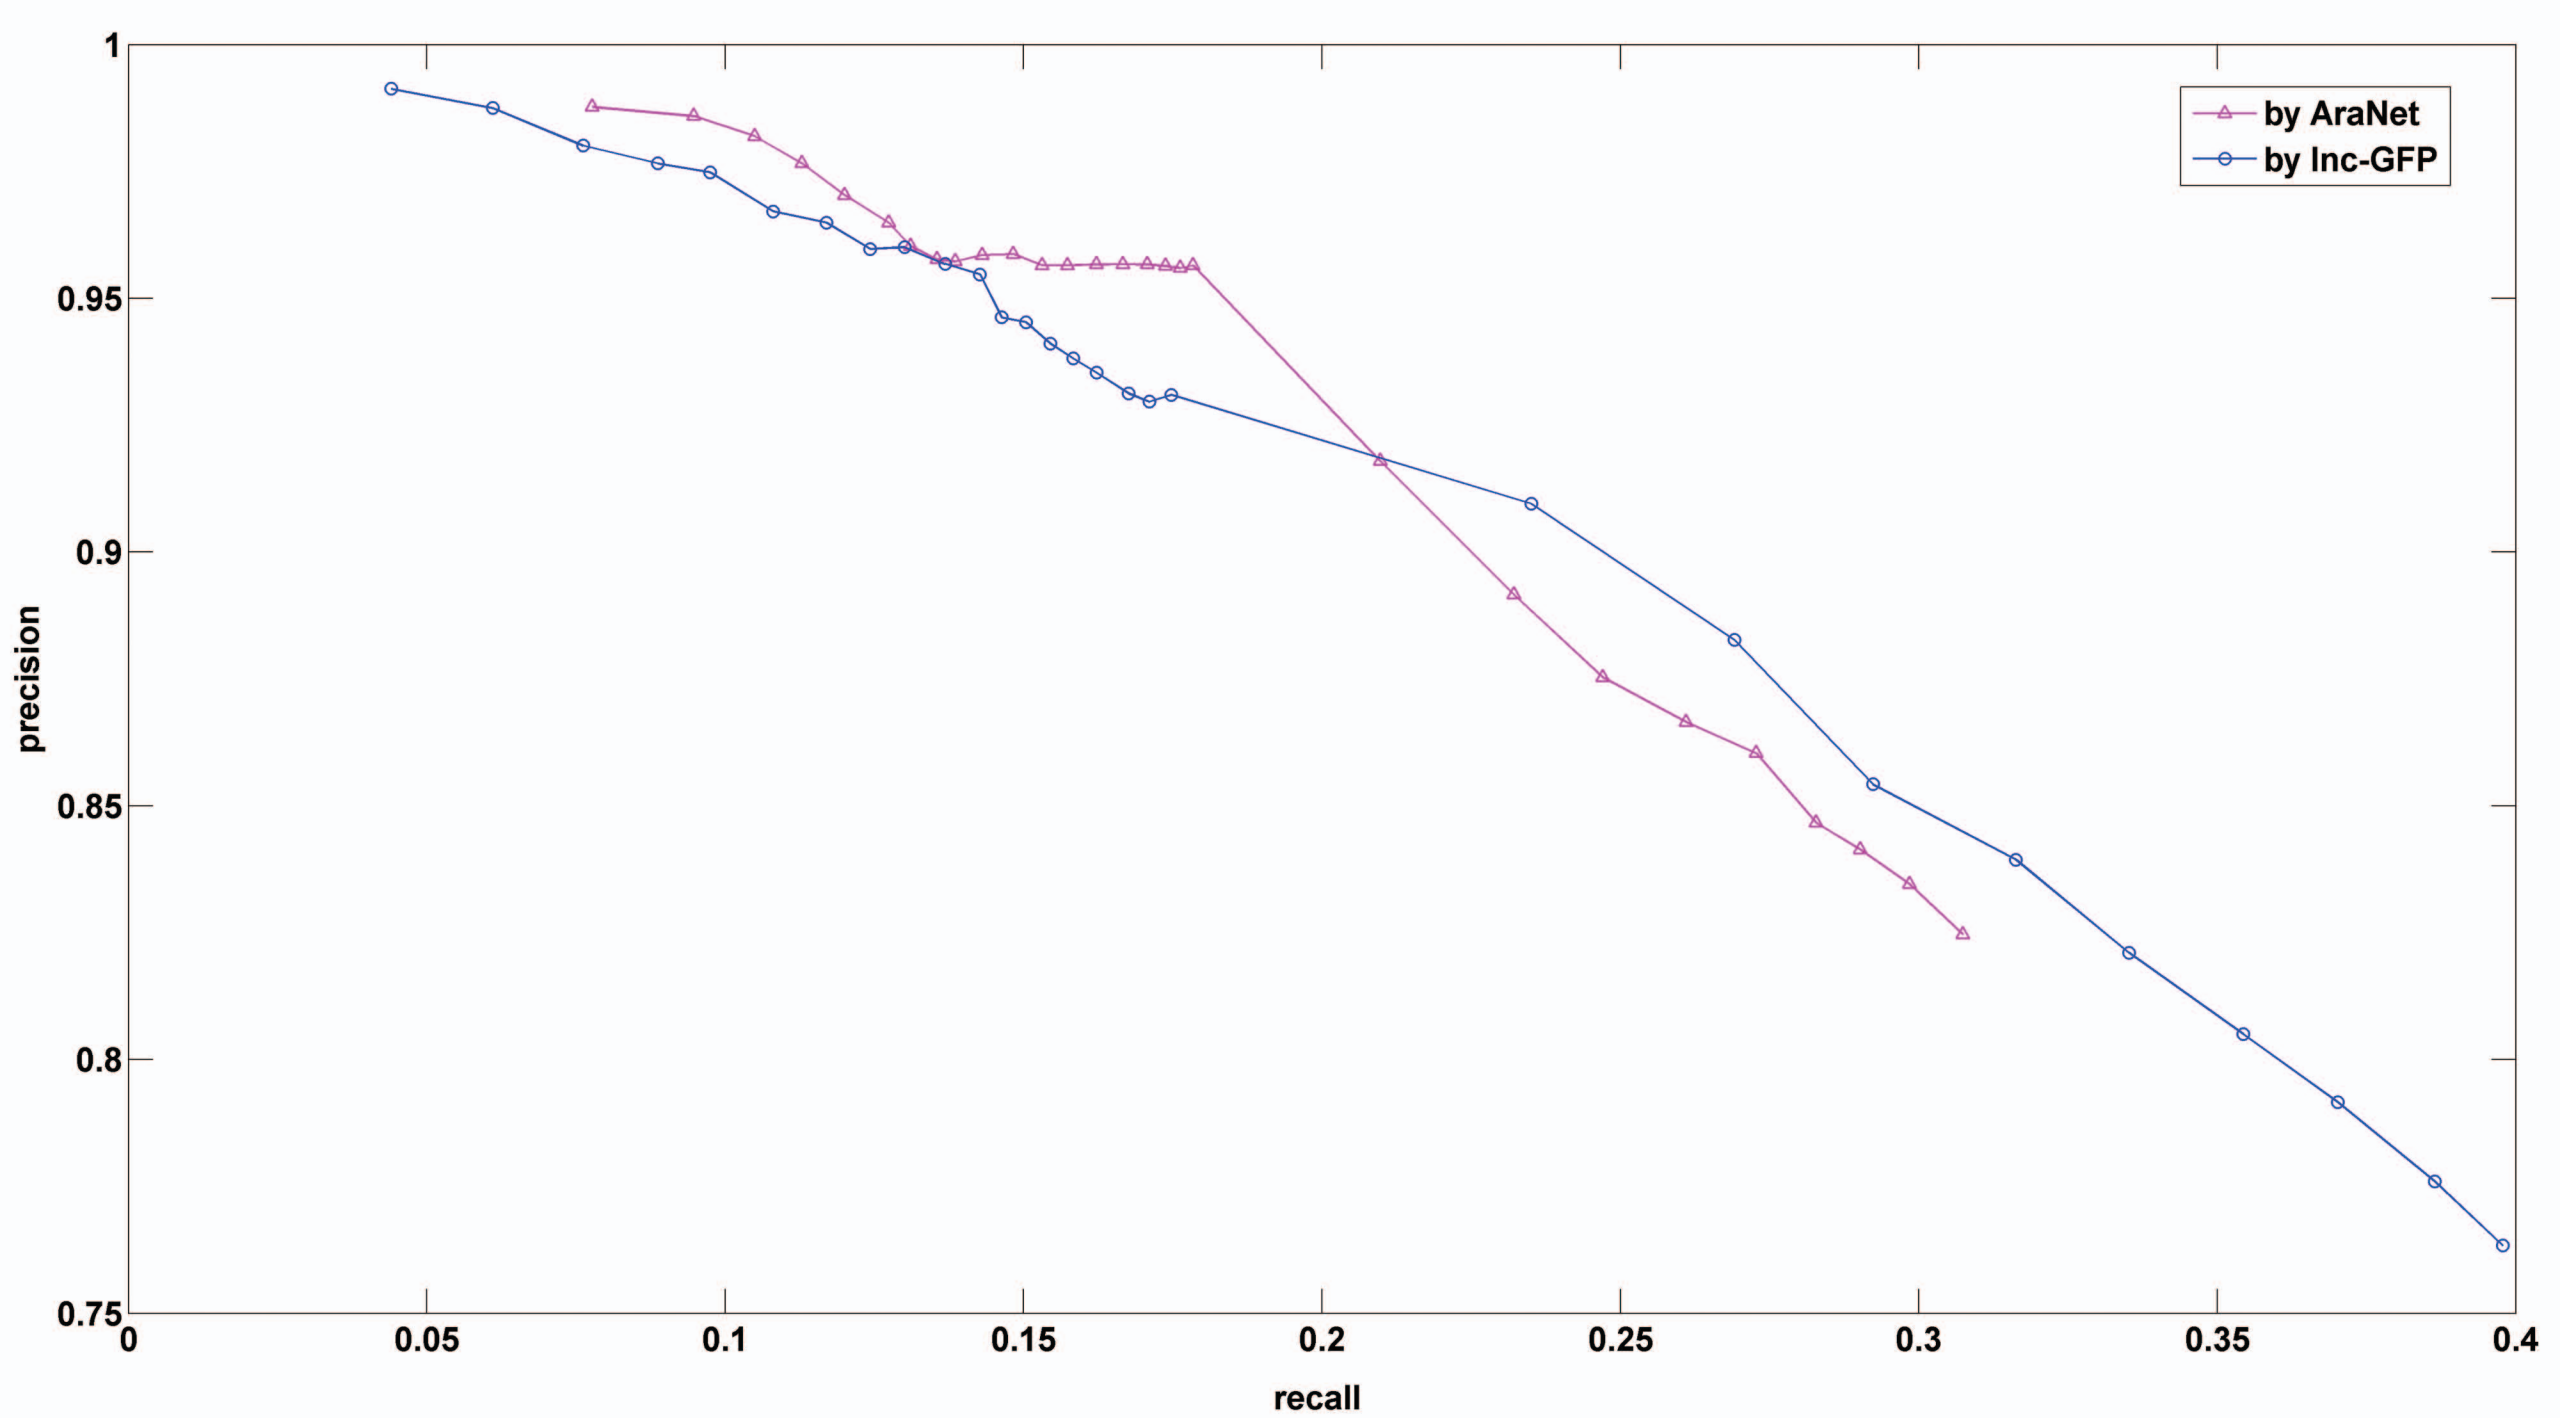

Supplement: supp_gks967_nar-01898-met-n-2012-File010.pdf [file supp_gks967_nar-01898-met-n-2012-File010.pdf]

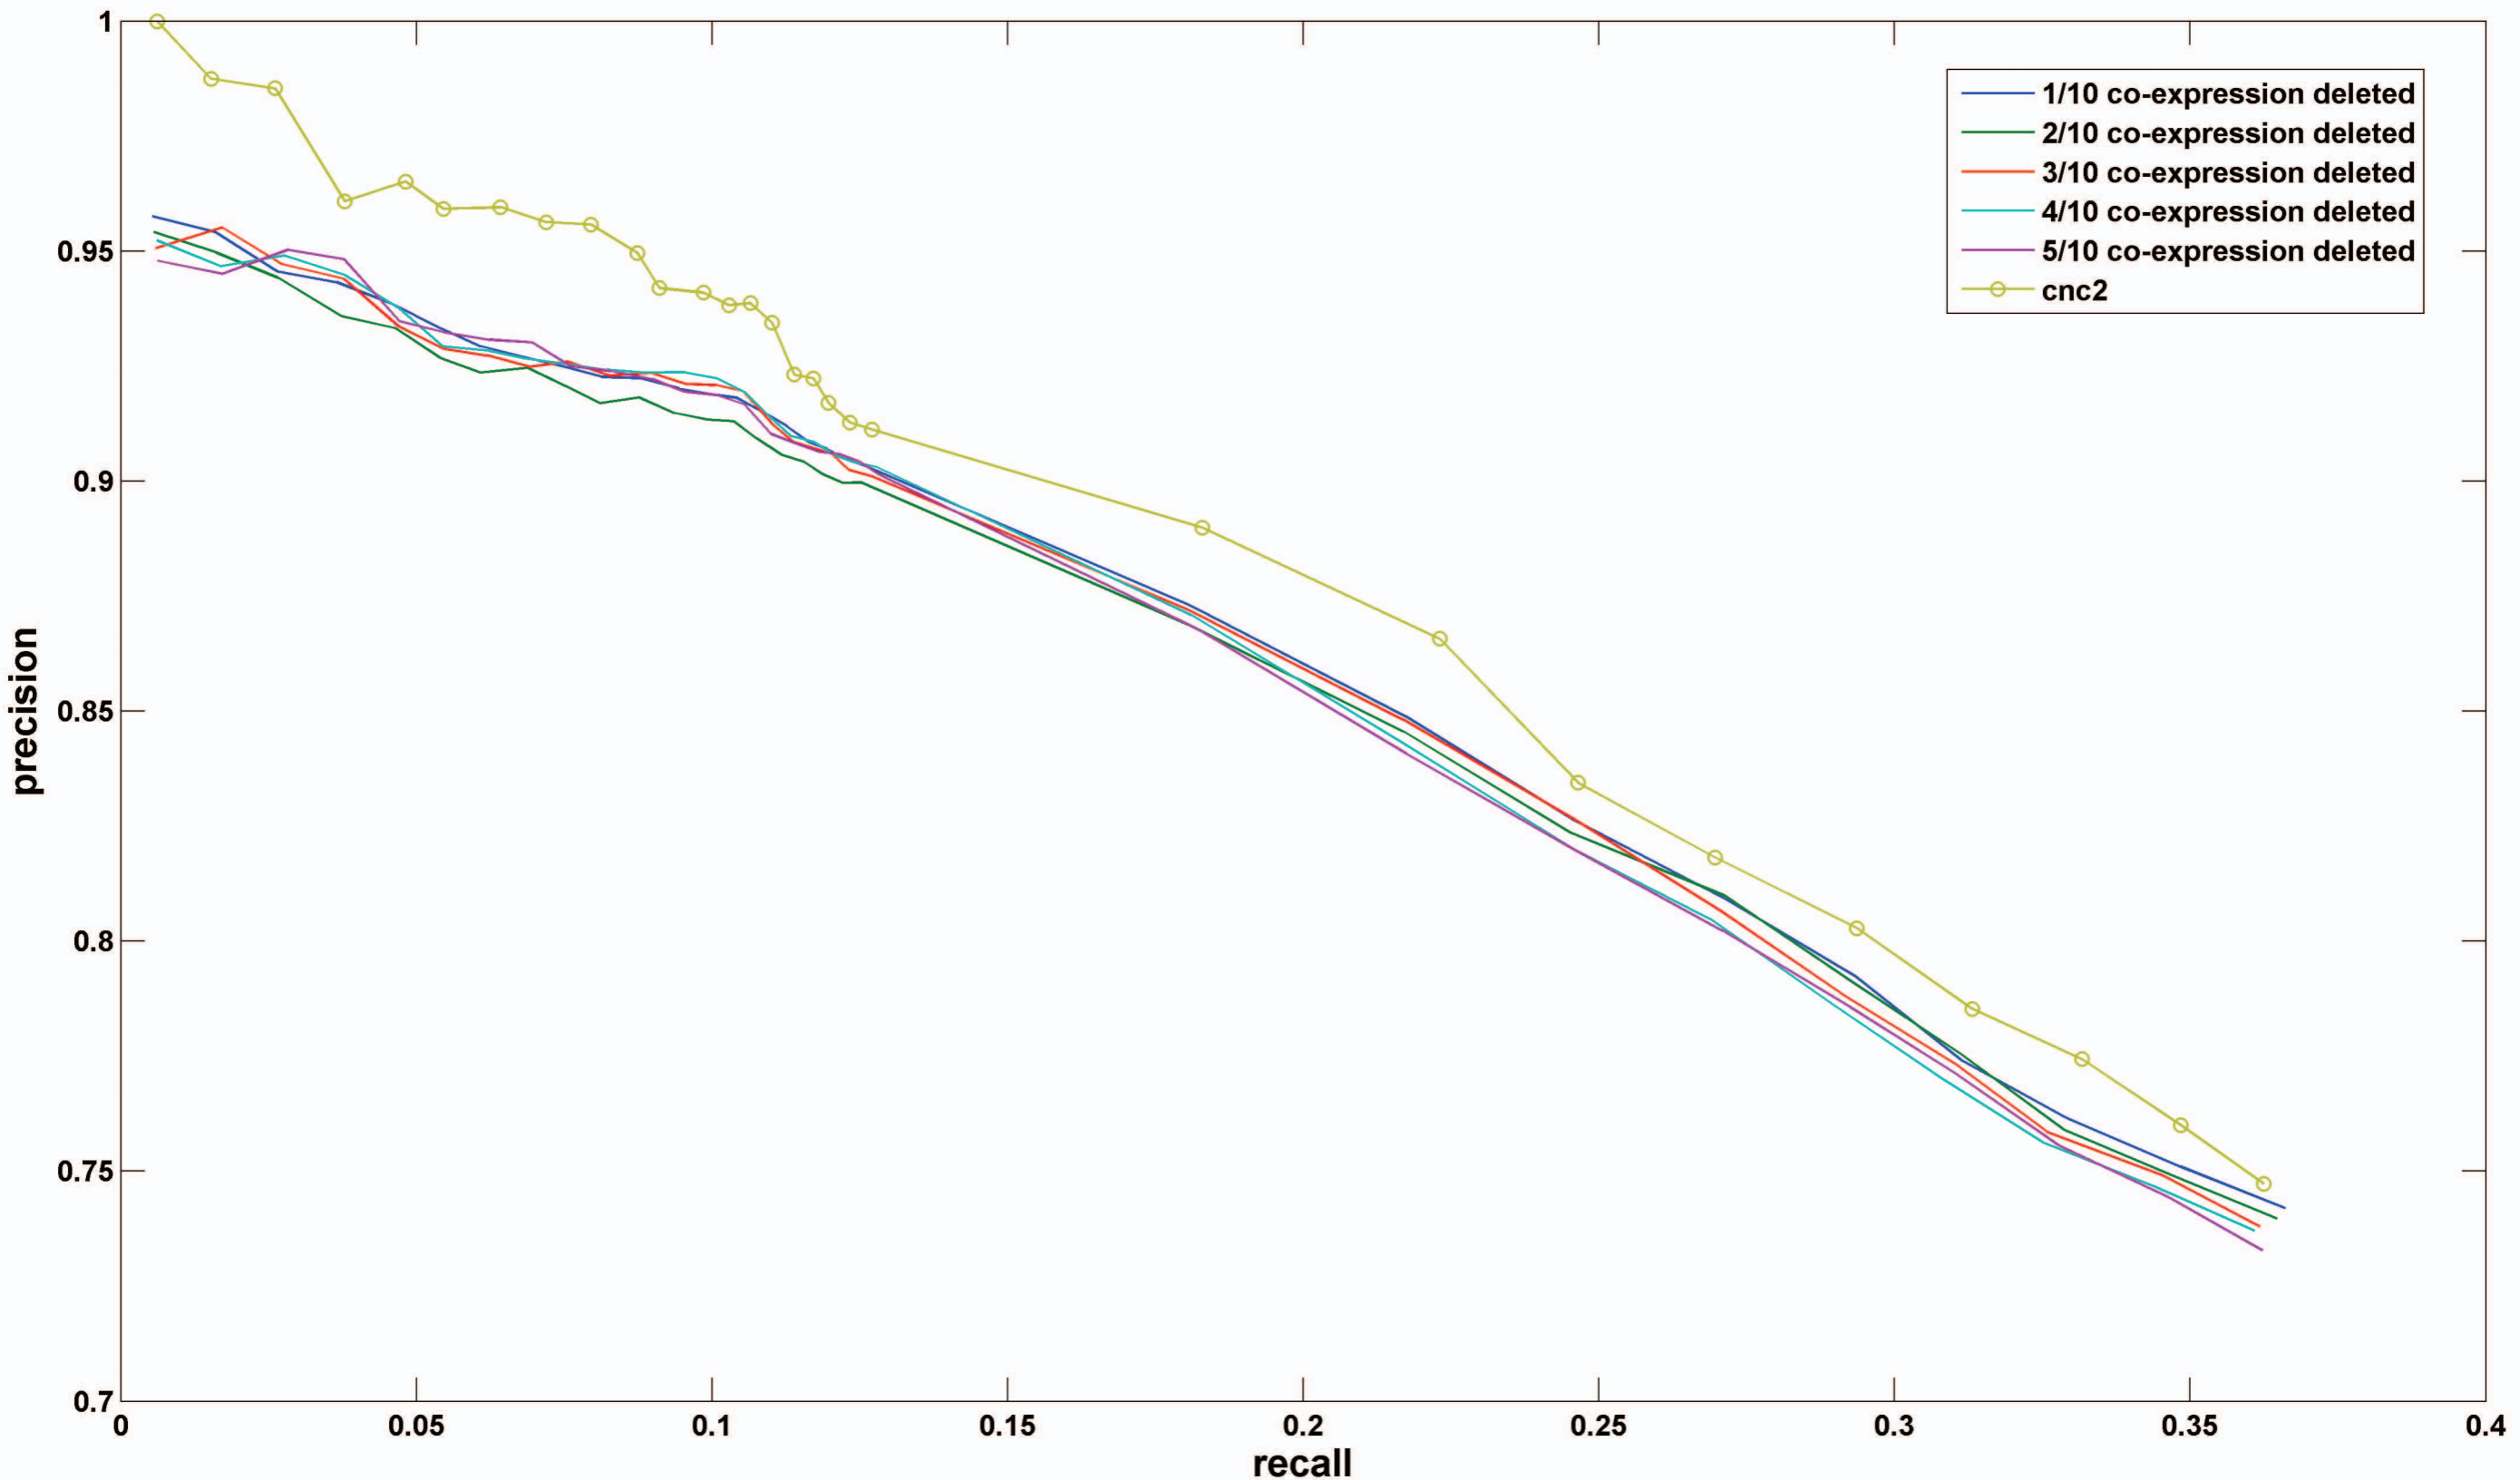

Supplement: supp_gks967_nar-01898-met-n-2012-File011.pdf [file supp_gks967_nar-01898-met-n-2012-File011.pdf]
